# Supplementary material
Source: MDPI journal article supplement (https://www.mdpi.com/2673-4125/3/1/9)
Supplement: s1 [file s1]

## NOTICE OF COPYRIGHT

This manuscript has been authored by UT-Battelle, LLC under Contract DE-AC05-00OR22725 with the U.S. Department of Energy (DOE). The U.S. government retains and the publisher, by accepting the article for publication, acknowledges that the US government retains a nonexclusive, paid-up, irrevocable, worldwide license to publish or reproduce the published form of this manuscript, or allow others to do so, for U.S. government purposes. DOE will provide public access to these results of federally sponsored research in accordance with the DOE Public Access Plan (<http://energy.gov/downloads/doe-public-access-plan>).

*Supporting Information for:* Investigation of the  
Impact of Lipid Acyl Chain Saturation on Fusion  
Peptide Interactions with Lipid Bilayers

William T. Heller<sup>a</sup>, Piotr A. Zolnierczuk<sup>a</sup>

<sup>a</sup>*Neutron Scattering Division Oak Ridge National Laboratory, Oak Ridge, TN 37831,  
USA*

---

---

## 1. Purity Assessment of the gp41rk Peptide

### HPLC REPORT

Order Number :SP200159  
 Name :peptide\_1 (21)  
 Sequence :RKGIGALFLGFLGAAGSTMKR-Amidation  
 Lot. No :GT90771/SP200159  
 Pump A :0.1%Trifluoroacetic in 100% water  
 Pump B :0.1%Trifluoroacetic in 100% acetonitrile  
 Total Flow :1ml/min  
 Wavelength :214nm  
 Analytical column type :SHIMADZU Inertsil ODS-SP(4.6\*250mm\*5um)  
 Dissolution method :100%H2O  
 Inj. Volume :25ul

| Time  | Module     | Action | Value |
|-------|------------|--------|-------|
| 0.01  | Pumps      | B.Conc | 20    |
| 25.00 | Pumps      | B.Conc | 85    |
| 30.00 | Pumps      | B.Conc | 100   |
| 38.00 | Pumps      | B.Conc | 100   |
| 40.00 | Pumps      | B.Conc | 20    |
| 50.00 | Controller | Stop   |       |

### Chromatogram

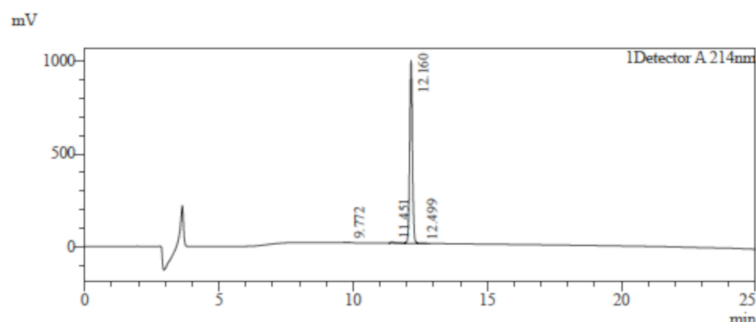

### Peak Table

| Peak# | Ret. Time | Area    | Height | Area%  |
|-------|-----------|---------|--------|--------|
| 1     | 9.772     | 8765    | 1670   | 0.12   |
| 2     | 11.451    | 82407   | 7852   | 1.14   |
| 3     | 12.160    | 7127113 | 986392 | 98.23  |
| 4     | 12.499    | 37139   | 2293   | 0.51   |
| Total |           | 7255424 | 998208 | 100.00 |

Figure S1: HPLC of the gp41rk peptide used for this study that was provided by Biomatik USA, LLC (Wilmington, DE) in the certificate of analysis.

## 2. Model for SANS Data Analysis

The SANS data were analyzed using a 3-shell vesicle model, similar to previous work [1, 2, 3]. The radius of the vesicle core was fixed to 500 Å during data fitting, as was done previously [1, 2, 3]. While it was not possible to fix the polydispersity to 0.3, as was done in the previous work [1, 2, 3], because *sas\_temper* cannot do so, it was constrained to be between 0.30000

and 0.30001. The structural model of the lipid bilayer for the three shells is based on the volumetric description of a lipid bilayer that was provided by Nagle and Tristram-Nagle [4]. Specifically the model follows the version of the volumetric model presented in the right panel of Figure 2C [4]. The schematic of the bilayer model is shown in Figure S2. Consider a lipid bilayer described by its steric thickness,  $D_b$ , which is related to the hydrocarbon chain thickness,  $D_{hc}$ , and the thickness of the headgroup,  $D_{hg}$ . Then,  $D_b$  is related to  $D_{hc}$  and  $D_{hg}$  through

$$D_b = 2D_{hc} + 2D_{hg}. \quad (1)$$

The value of  $D_{hc}$  is related to the area per lipid,  $A_L$ , and the lipid chain volume,  $V_c$  through the relation

$$D_{hc} = V_c/A_L. \quad (2)$$

The value of  $A_L$  that is used here for the mixed lipid bilayers studied is the average area per lipid, and it is one of the free parameters used in the SANS data analysis. The volume of the lipid chains,  $V_c$ , is calculated using the values presented in Table 1 and the composition of the sample being modeled. The value of  $D_{hg}$  used in the modeling was the value for PC bilayers (9 Å) that was presented in Reference [4], even though the present study used mixtures of PC and PG lipids. Other researchers studying the structure of pure PG lipid bilayers found a comparable lipid headgroup thickness PG lipids [5, 6], so the one value is employed in the SANS data analysis here.

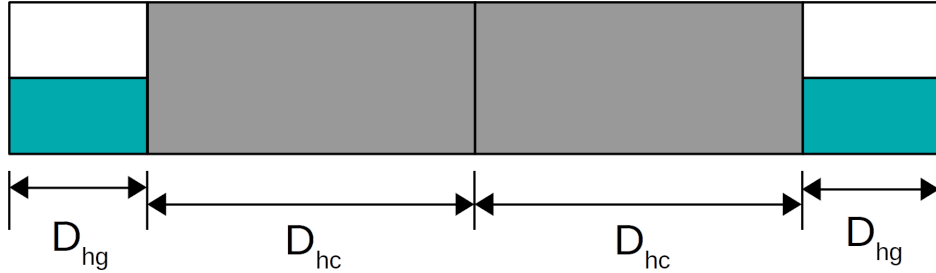

Figure S2: Schematic of the volumetric model of the lipid bilayer. The two hydrocarbon chain regions are shown in grey, the lipid headgroup is shown in teal and the water associated with the lipid headgroups are shown in white.

The composition of the lipid headgroup regions of the bilayer, which are assumed to be the same here, has to be determined in order to calculate the scattering length density (SLD),  $\rho$ , for use in the SANS intensity calculation. Much like the  $V_{hc}$  for a given sample, the average volume of the lipid

| Group              | $b_{tot}$ ( $10^{-5}$ Å) | Volume ( $\text{\AA}^3$ ) | Names                    |
|--------------------|--------------------------|---------------------------|--------------------------|
| PC Headgroup       | 60.09                    | 320.0 [9]                 | $b_{PC,HG}, V_{PC,HG}$   |
| PG Headgroup       | 91.776                   | 300.0 [8]                 | $b_{PG,HG}, V_{PG,HG}$   |
| Dimyristoyl chains | -29.06                   | 780.0 [9]                 | $b_{DM}, V_{DM}$         |
| Palmitoyl chain    | -17.89                   | 467.6 [10]                | $b_P, V_P$               |
| Oleyl chain        | -12.09                   | 468.4 [10]                | $b_O, V_O$               |
| gp41rk             | 842.08                   | 2791.8 [11]               | $b_{gp41rk}, V_{gp41rk}$ |
| D <sub>2</sub> O   | 19.14                    | 30.0                      | $b_{D_2O}, V_{D_2O}$     |

Table S1: Parameters for SANS data analysis. Total neutron scattering lengths,  $b_{tot}$ , were calculated from the chemical composition and values of the atomic neutron scattering lengths provided by Sears [7]. The corresponding volumes of the chemical groups in the samples that were used to calculate the SLDs of the layers in the model were taken from literature values [8, 9, 10, 11]. Chemical groups on the PG headgroup and on gp41rk with exchangeable hydrogen atoms have these atoms replaced with deuterium for the calculation because the solvent is D<sub>2</sub>O. The names of the parameters used in Equations S1-S9 are also provided.

headgroup,  $V_{Lhg}$ , is calculated from the sample composition and the values presented in Table 1. In addition to the lipid headgroups in these two regions of the model, this region of the model contains water and may contain peptide at the prepared peptide-to-lipid ratio,  $P/L$ , if it is present in the sample. The volume of the headgroup region of the bilayer is related to  $V_{Lhg}$ ,  $D_{hg}$  and  $A_L$ , which in turn can be related to the number of water molecules in the region,  $n_w$  and any peptide associated with the headgroup region of the bilayer, as is shown in Equation 3.

$$V_{hg} = A_L D_{hg} = (P/L)V_p + V_{Lhg} + n_w V_{D_2O}. \quad (3)$$

Here,  $V_{D_2O}$  is the volume of a water molecule and  $V_p$  is the volume of the peptide, which are provided in Table S1. Using Equation 3, it is possible to calculate  $n_w$  for use in the calculation of the scattering length density of the lipid headgroup layers in the model during SANS data analysis.

$$n_w = \frac{A_L D_{hg} - (P/L)f_{insert}V_p - V_{Lhg}}{V_{D_2O}}. \quad (4)$$

The model requires only one other parameter, the fraction of peptide inserted across the bilayer,  $f_{insert}$ , to calculate the scattering length densities of the layers in the model. Additional parameters required for the modeling are the scale factor for the calculated SANS intensity profile and the constant baseline. In total, the structure used to model the SANS intensity profiles is parameterized using four free parameters ( $A_L$ ,  $f_{insert}$ , the scale and the

baseline). The  $P/L$  and the fraction of DM lipids,  $f_{DM}$ , are also required for the model, but they are determined by the composition. The SLDs of the three layers in the model (the inner headgroup, hydrocarbon core and outer headgroup) are calculated using Equations 5 to 13.

$$b_{HG,in} = 0.7 b_{PC,HG} + 0.3 b_{PG,HG} + 0.5 (1 - f_{insert}) (P/L) b_{gp41rk} + n_w b_{D_2O}. \quad (5)$$

$$V_{HG,in} = 0.7 V_{PC,HG} + 0.3 V_{PG,HG} + 0.5 (1 - f_{insert}) (P/L) V_{gp41rk} + n_w V_{D_2O}. \quad (6)$$

$$\rho_{HG,in} = \frac{b_{HG,in}}{V_{HG,out}}. \quad (7)$$

$$b_{HC} = f_{DM} b_{DM} + (1 - f_{DM}) (b_O + b_P) + 0.5 f_{insert} (P/L) b_{gp41rk}. \quad (8)$$

$$V_{HC} = f_{DM} V_{DM} + (1 - f_{DM}) (V_O + V_P) + 0.5 f_{insert} (P/L) V_{gp41rk}. \quad (9)$$

$$\rho_{HC} = \frac{b_{HC}}{V_{HC}}. \quad (10)$$

$$b_{HG,out} = b_{HG,in}. \quad (11)$$

$$V_{HG,out} = V_{HG,in}. \quad (12)$$

$$\rho_{HG,out} = \frac{b_{HG,out}}{V_{HG,out}}. \quad (13)$$

### 3. SANS Data Analysis Results

| Sample                 | $\chi^2$ range      | scale             | baseline               | $A_L$ ( $\text{\AA}^2$ ) | $f_{insert}$      |
|------------------------|---------------------|-------------------|------------------------|--------------------------|-------------------|
| Lipid-1,<br>P/L = 0    | 41.1843-<br>41.1846 | 30.1 $\pm$<br>0.1 | 0.0851 $\pm$<br>0.0001 | 59.2 $\pm$ 0.1           | 0                 |
| Lipid-1,<br>P/L = 1/50 | 36.8395-<br>36.8502 | 32.2 $\pm$<br>0.1 | 0.0827 $\pm$<br>0.0001 | 59.7 $\pm$ 0.1           | 0.479 $\pm$ 0.236 |
| Lipid-2,<br>P/L = 0    | 42.9936-<br>42.9937 | 29.6 $\pm$<br>0.1 | 0.0822 $\pm$<br>0.0001 | 65.1 $\pm$ 0.1           | 0                 |
| Lipid-2,<br>P/L = 1/50 | 42.3150-<br>42.3184 | 34.0 $\pm$<br>0.1 | 0.0832 $\pm$<br>0.0001 | 66.8 $\pm$ 0.1           | 0.345 $\pm$ 0.190 |
| Lipid-3,<br>P/L = 0    | 47.7750-<br>47.7750 | 29.4 $\pm$<br>0.1 | 0.0803 $\pm$<br>0.0001 | 62.9 $\pm$ 0.1           | 0                 |
| Lipid-3,<br>P/L = 1/50 | 35.9740-<br>35.9757 | 34.9 $\pm$<br>0.1 | 0.0813 $\pm$<br>0.0001 | 63.7 $\pm$ 0.1           | 0.449 $\pm$ 0.273 |

Table S2: Results of the SANS data analysis. The values presented are the averages  $\pm$  standard deviations, which were rounded up to the same number of significant figures as the values, that were found during the modeling as described in Section 2.5.

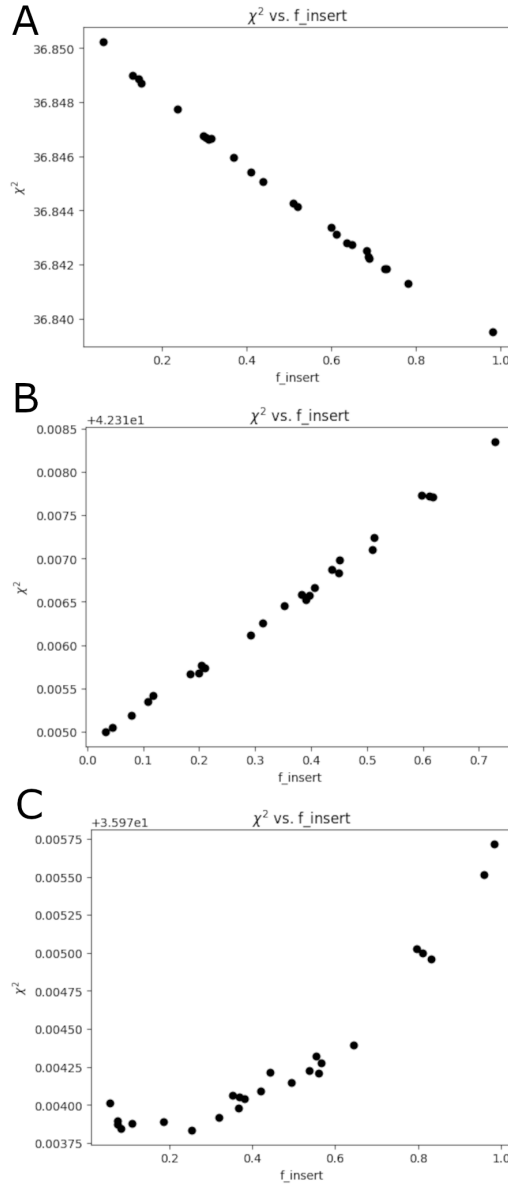

Figure S3:  $\chi^2$  vs.  $f_{insert}$  plots output by *sas-temper* [12] for Lipid-1 (A), Lipid-2 (B) and Lipid-3 (C) with gp41rk at P/L = 1/50.



## 4. NSE Data

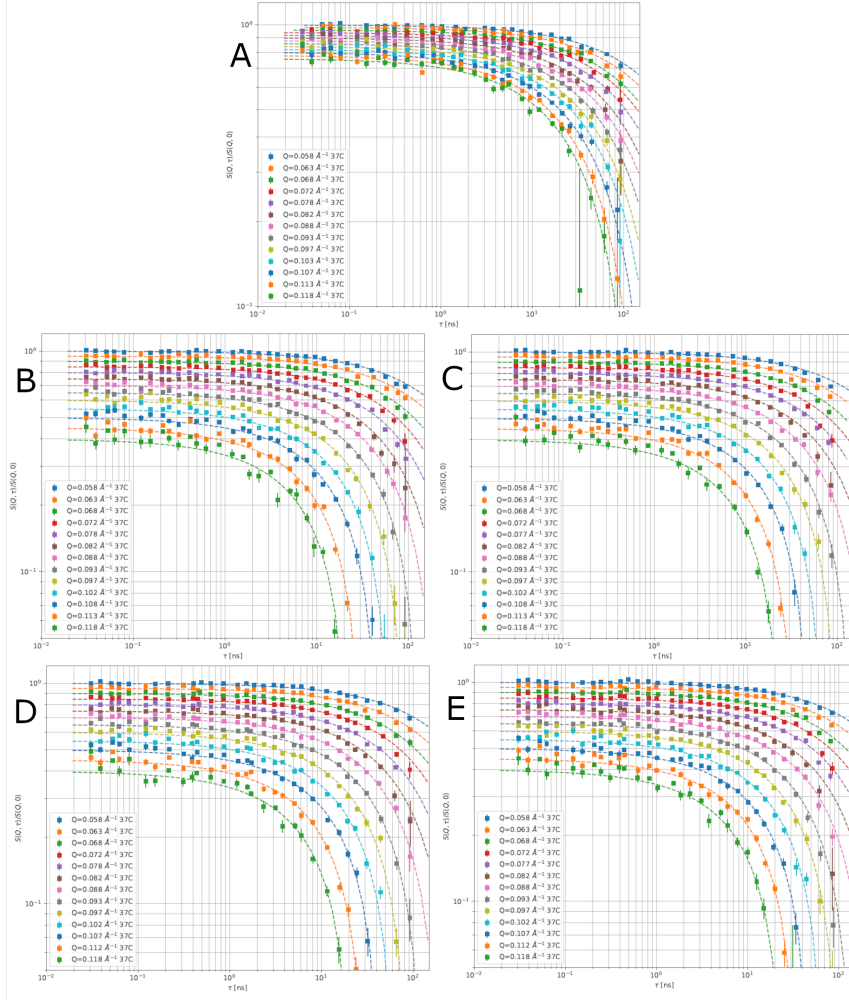

Figure S4: NSE data collected for the vesicles with and without gp41rk. Lipid-1 P/L = 1/50 (A), Lipid-2 P/L = 0 (B), Lipid-2 P/L = 1/50 (C), Lipid-3 P/L = 0 (D) and Lipid-3 P/L = 1/50 (E). The various  $q$ -values are shown in the figure legends. The symbols are the measured data points, while the lines are the fit to the data using Equation 1. The curves have been offset for clarity.

## 5. MD Simulations

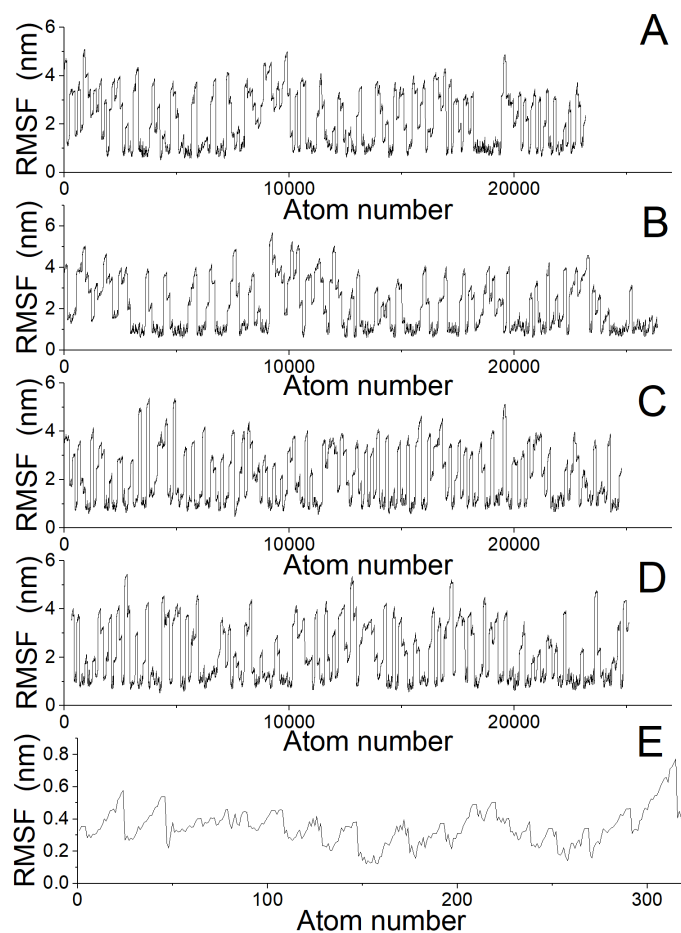

Figure S5: RMSF data for the lipids in the four simulations performed and the gp41rk from the Lipid-3/gp41rk simulation. Panel A is from the Lipid-1 simulation. The curve from Panel B is from the Lipid-2 simulation. Panel C is from the Lipid-3 simulation. Panel D is the lipid from the Lipid-3/gp41rk simulation, while Panel E is the peptide from that simulation.

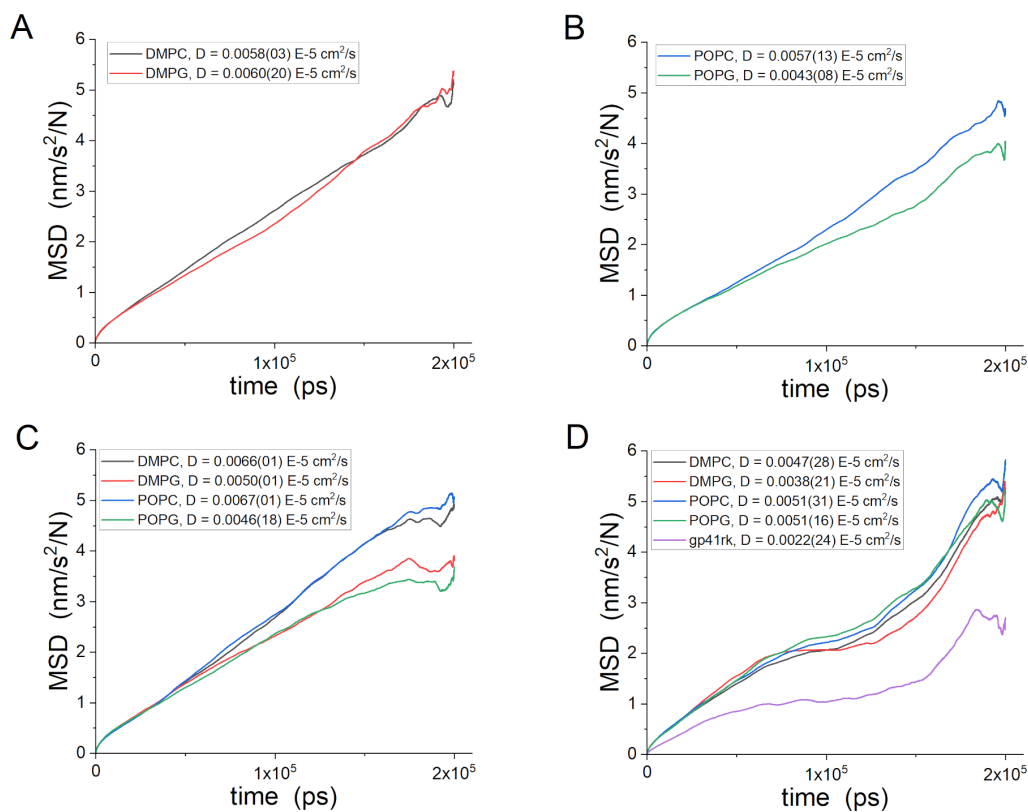

Figure S6: MSD and diffusion coefficients calculated from the four simulations performed. Panel A is from the Lipid-1 simulation, while Panel B is from the Lipid-2 simulation. The results from Lipid-3 are presented in Panel C, while the Lipid-3/gp41rk results are presented in Panel D. Diffusion coefficients determined using the default fitting parameters are shown in the legends of the figures.

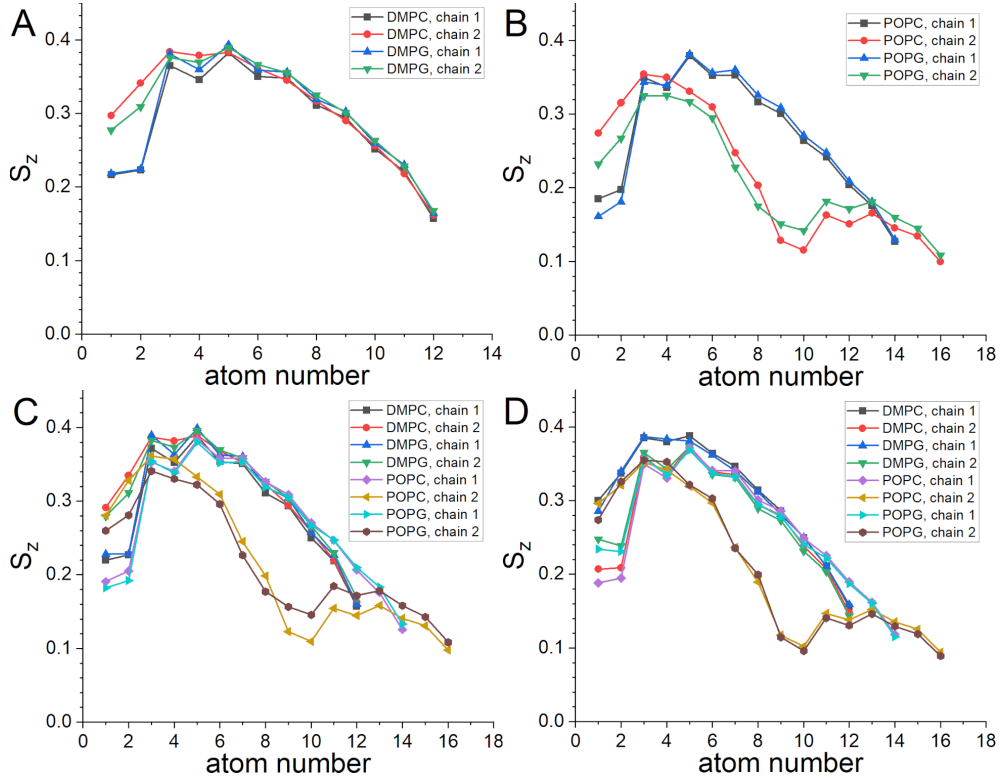

Figure S7: Chain order parameters from the MD simulations. Panel A is from the Lipid-1 simulation, Panel B shows the results from the Lipid-2 simulation, the order parameters from the Lipid-3 simulations are shown in Panel C, and the lipid order parameters calculated from the Lipid-3/gp41rk simulation are shown in Panel D.

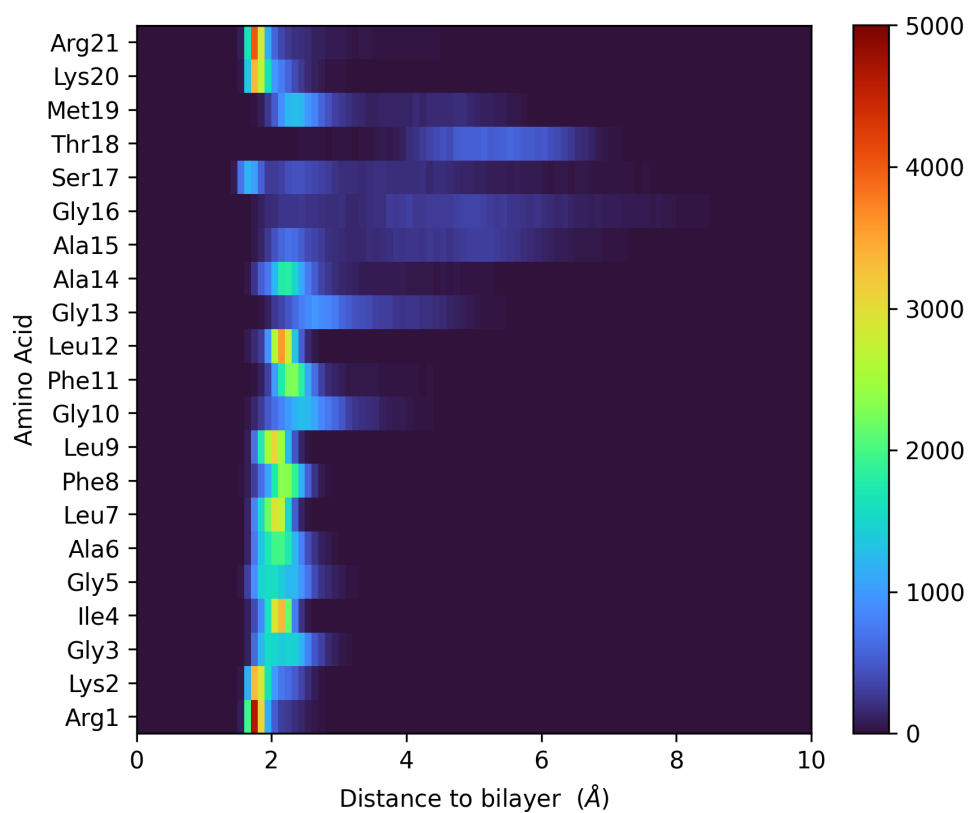

Figure S8: Histograms of the minimum distance between any lipid atom and the atoms of each amino acid residue of gp41rk. The calculated distances determined as a function of time during the Lipid-3/gp41rk simulation were used to create the histograms. The figure was generated from the output of *mindist* [13]. Custom Python code using Matplotlib [14] was written to create the figure from the output of *mindist*.

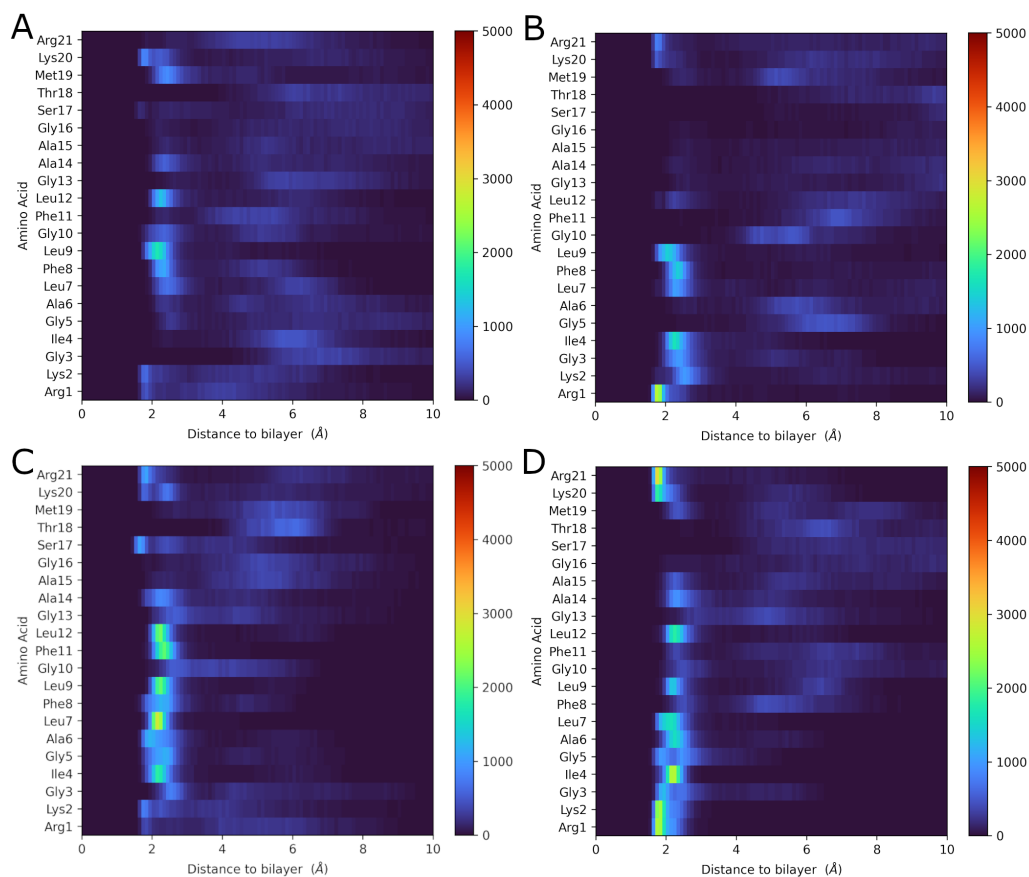

Figure S9: Histograms of the minimum distance between each type of lipid atom and the atoms of each amino acid residue of gp41rk. Panel A is DMPC, Panel B is DMPG, Panel C is POPC and Panel D is POPG. The calculated distances determined as a function of time during the Lipid-3/gp41rk simulation were used to create the histograms. The figure was generated from the output of *mindist* [13]. Custom Python code using Matplotlib [14] was written to create the figure from the output of *mindist*.

## Funding

This research used resources at the Spallation Neutron Source, a DOE Office of Science User Facility operated by the Oak Ridge National Laboratory.

## Acknowledgements

The authors would like to thank H. M. O'Neill and K. Weiss for access to the CD instrument, K. L. Weiss for access to the Bio-Labs at the Spallation Neutron Source and C. Gao and M. Odom for technical assistance during the neutron scattering experiments.

## Conflict of Interest

The authors declare no conflict of interest.

## References

- [1] W. T. Heller, D. K. Rai, Changes in lipid bilayer structure caused by the helix-to-sheet transition of an hiv-1 gp41 fusion peptide derivative, *Chemistry and Physics of Lipids* 203 (2017) 46–53. doi:10.1016/j.chemphyslip.2017.01.004.
- [2] W. T. Heller, P. A. Zolnierczuk, The helix-to-sheet transition of an hiv-1 fusion peptide derivative changes the mechanical properties of lipid bilayer membranes, *Biochimica Et Biophysica Acta-Biomembranes* 1861 (3) (2019) 565–572. doi:10.1016/j.bbamem.2018.12.004.
- [3] W. T. Heller, A small-angle neutron scattering study of the physical mechanism that drives the action of a viral fusion peptide, *Chemistry and Physics of Lipids* 234 (JAN 2021). doi:10.1016/j.chemphyslip.2020.105022.
- [4] J. F. Nagle, S. Tristram-Nagle, Structure of lipid bilayers, *Biochimica et Biophysica Acta (BBA) - Reviews on Biomembranes* 1469 (3) (2000) 159–195. doi:10.1016/S0304-4157(00)00016-2.
- [5] N. Kučerka, B. W. Holland, C. G. Gray, B. Tomberli, J. Katsaras, Scattering density profile model of popg bilayers as determined by molecular dynamics simulations and small-angle neutron and x-ray scattering experiments, *The Journal of Physical Chemistry B* 116 (1) (2012) 232–239. doi:10.1021/jp208920h.

- [6] J. Pan, F. A. Heberle, S. Tristram-Nagle, M. Szymanski, M. Koepfinger, J. Katsaras, N. Kučerka, Molecular structures of fluid phase phosphatidylglycerol bilayers as determined by small angle neutron and x-ray scattering, *Biochimica et Biophysica Acta (BBA) - Biomembranes* 1818 (9) (2012) 2135–2148. doi:10.1016/j.bbamem.2012.05.007.
- [7] V. F. Sears, Neutron scattering lengths and cross sections, *Neutron News* 3 (3) (1992) 26–37. doi:10.1080/10448639208218770.
- [8] J. Marra, Direct measurement of the interaction between phosphatidylglycerol bilayers in aqueous electrolyte solutions, *Biophysical Journal* 50 (5) (1986) 815–825. doi:10.1016/S0006-3495(86)83522-6.
- [9] R. S. Armen, O. D. Uitto, S. E. Feller, Phospholipid component volumes: Determination and application to bilayer structure calculations, *Biophysical Journal* 75 (2) (1998) 734–744. doi:10.1016/S0006-3495(98)77563-0.
- [10] N. Kučerka, S. Tristram-Nagle, J. F. Nagle, Structure of fully hydrated fluid phase lipid bilayers with monounsaturated chains, *Journal of Membrane Biology* 208 (3) (2005) 193–202. doi:10.1007/s00232-005-7006-8.
- [11] B. Jacrot, The study of biological structures by neutron scattering from solution, *Reports on Progress in Physics* 39 (10) (1976) 911–953. doi:10.1088/0034-4885/39/10/001.
- [12] W. T. Heller, M. Doucet, R. K. Archibald, Sas-temper: Software for fitting small-angle scattering data that provides automated reproducibility characterization, *SoftwareX* 16 (2021) 100849. doi:10.1016/j.softx.2021.100849.
- [13] M. J. Abraham, T. Murtola, R. Schulz, P. S., J. C. Smith, B. Hess, E. Lindahl, Gromacs: High performance molecular simulations through multi-level parallelism from laptops to supercomputers, *SoftwareX* 1-2 (2015) 19–25. doi:10.1016/j.softx.2015.06.001.
- [14] J. D. Hunter, Matplotlib: A 2d graphics environment, *Computing in Science & Engineering* 9 (3) (2007) 90–95. doi:10.1109/MCSE.2007.55.
